# Supplementary material
Source: Springer Nature journal article supplement (https://www.springermedizin.de/resource/supplementary/12885_2007_960_MOESM6_ESM.pdf/9471256)

# COX model

## Time to event is "Overall symptom interval"

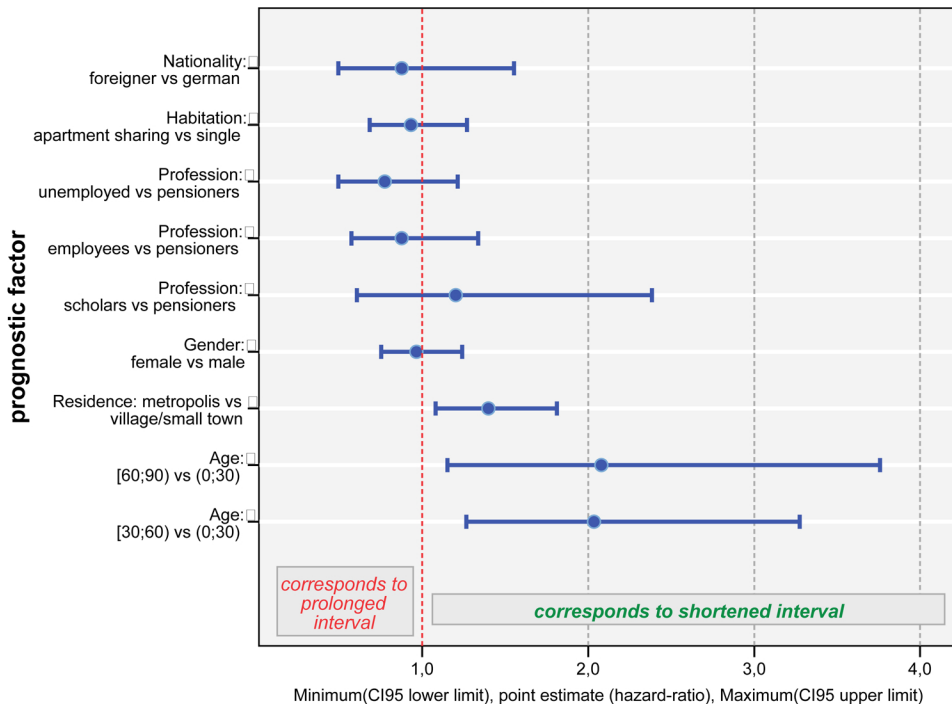

Supplement: MOESM6 [file 9471256]
